# Supplementary material for: Effect of Preventive Supplementation with Zinc and Other Micronutrients on Non-Malarial Morbidity in Tanzanian Pre-School Children: A Randomized Trial
Source: PLoS One. 2012 Aug 3;7(8):e41630. doi: 10.1371/journal.pone.0041630 (PMC3411720; doi:10.1371/journal.pone.0041630)
Supplement: Checklist S1 — CONSORT checklist. (DOC) [file pone.0041630.s001.doc]

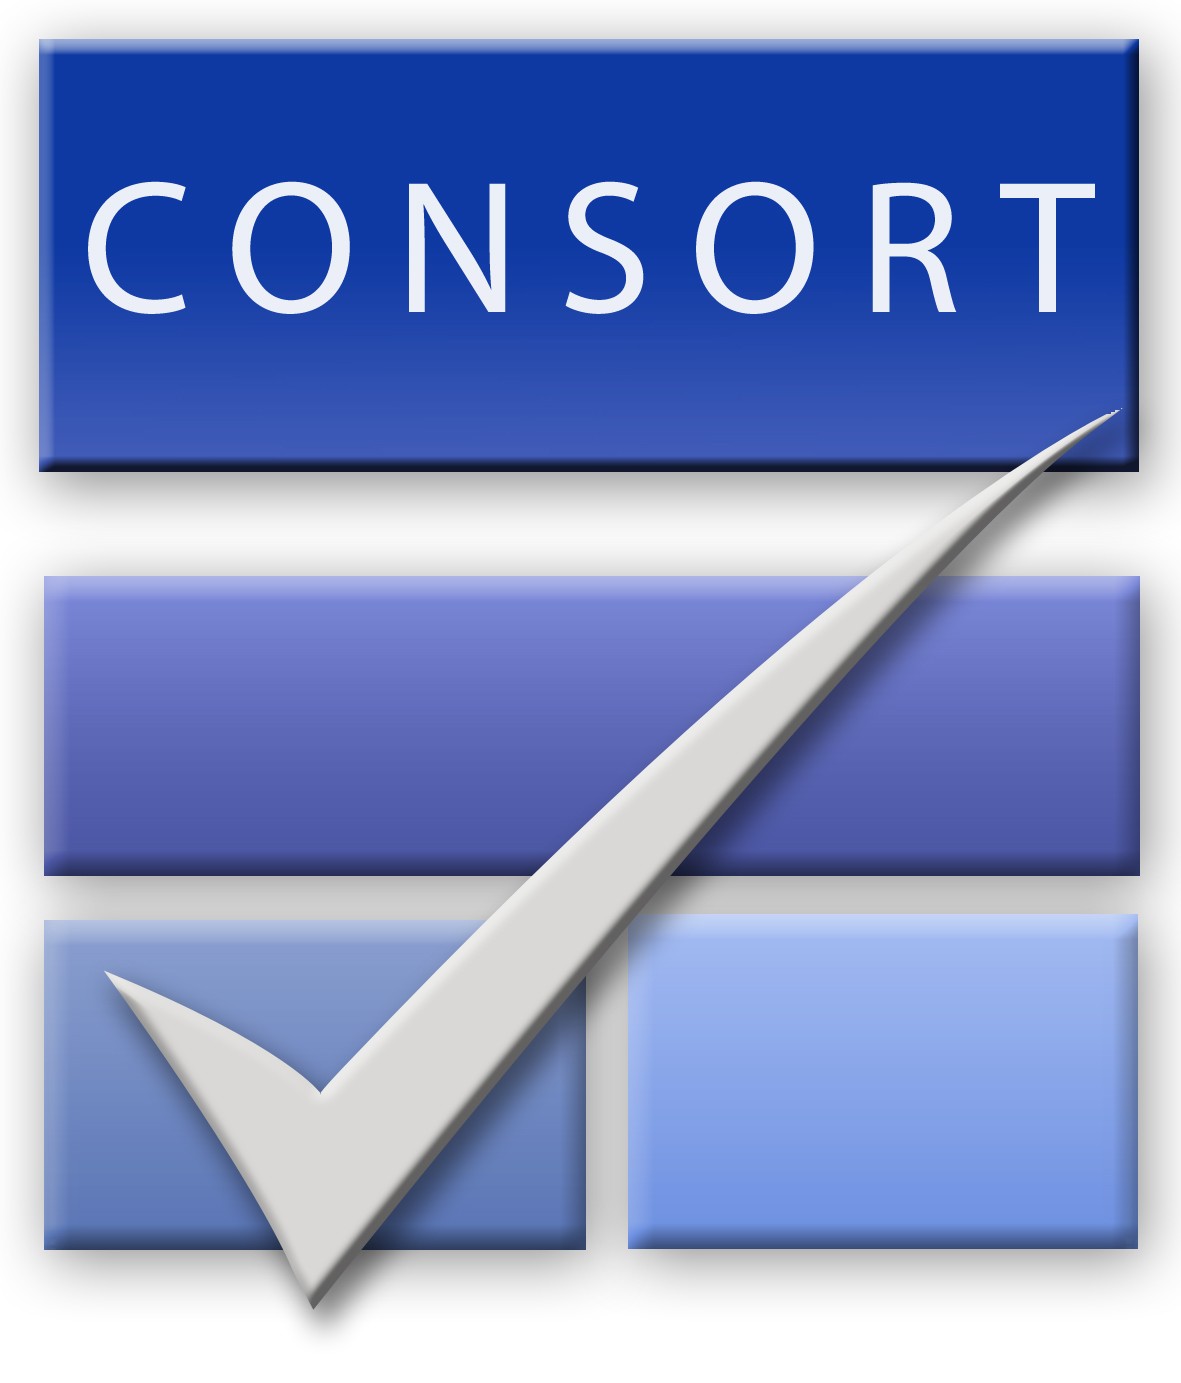
CONSORT 2010 checklist of information to include when reporting a randomised trial

| Section/Topic | Item No | Checklist item | Reported on page number |
| --- | --- | --- | --- |
| Title and abstract | | | |
|  | 1a | Identification as a randomised trial in the title | Title |
| 1b | Structured summary of trial design, methods, results, and conclusions (for specific guidance see CONSORT for abstracts) | Summary |
| Introduction | | | |
| Background and objectives | 2a | Scientific background and explanation of rationale | Introduction |
| 2b | Specific objectives or hypotheses | Introduction, last paragraph |
| Methods | | | |
| Trial design | 3a | Description of trial design (such as parallel, factorial) including allocation ratio | Methods, section ‘Randomization and interventions’ |
| 3b | Important changes to methods after trial commencement (such as eligibility criteria), with reasons | Methods, 1st paragraph |
| Participants | 4a | Eligibility criteria for participants | Methods, section ‘Recruitment’ |
| 4b | Settings and locations where the data were collected | Methods, section ‘Study area’ |
| Interventions | 5 | The interventions for each group with sufficient details to allow replication, including how and when they were actually administered | Methods, section ‘Randomization and interventions’, Table 1 |
| Outcomes | 6a | Completely defined pre-specified primary and secondary outcome measures, including how and when they were assessed | Methods, section ‘Outcome definitions’ |
| 6b | Any changes to trial outcomes after the trial commenced, with reasons | Not applicable |
| Sample size | 7a | How sample size was determined | Not reported * |
| 7b | When applicable, explanation of any interim analyses and stopping guidelines | Not applicable |
| Randomisation: |  |  |  |
| Sequence generation | 8a | Method used to generate the random allocation sequence | Methods, section ‘Randomization and interventions’ |
| 8b | Type of randomisation; details of any restriction (such as blocking and block size) | Methods, section ‘Randomization and interventions’ |
| Allocation concealment mechanism | 9 | Mechanism used to implement the random allocation sequence (such as sequentially numbered containers), describing any steps taken to conceal the sequence until interventions were assigned | Methods, section ‘Randomization and interventions’† |
| Implementation | 10 | Who generated the random allocation sequence, who enrolled participants, and who assigned participants to interventions | Methods, section ‘Randomization and interventions’† |
| Blinding | 11a | If done, who was blinded after assignment to interventions (for example, participants, care providers, those assessing outcomes) and how | Methods, section ‘Randomization and interventions’ |
| 11b | If relevant, description of the similarity of interventions | Methods, section ‘Randomization and interventions’ |
| Statistical methods | 12a | Statistical methods used to compare groups for primary and secondary outcomes | Methods, section ‘Statistical analysis’ |
| 12b | Methods for additional analyses, such as subgroup analyses and adjusted analyses | Methods, section ‘Statistical analysis’ |
| Results | | | |
| Participant flow (a diagram is strongly recommended) | 13a | For each group, the numbers of participants who were randomly assigned, received intended treatment, and were analysed for the primary outcome | Figure 1 |
| 13b | For each group, losses and exclusions after randomisation, together with reasons | Results, 2nd paragraph; Figure 1 † |
| Recruitment | 14a | Dates defining the periods of recruitment and follow-up | Methods, sections ‘Recruitment’ and ‘Follow-up and case detection’ |
| 14b | Why the trial ended or was stopped | Methods, section ‘Follow-up and case detection’ |
| Baseline data | 15 | A table showing baseline demographic and clinical characteristics for each group | Table 2 |
| Numbers analysed | 16 | For each group, number of participants (denominator) included in each analysis and whether the analysis was by original assigned groups | Methods, section ‘Statistical analysis’, Table 2, Figure 1 |
| Outcomes and estimation | 17a | For each primary and secondary outcome, results for each group, and the estimated effect size and its precision (such as 95% confidence interval) | Results, Table 4, Figure 2 |
| 17b | For binary outcomes, presentation of both absolute and relative effect sizes is recommended | See below ‡ |
| Ancillary analyses | 18 | Results of any other analyses performed, including subgroup analyses and adjusted analyses, distinguishing pre-specified from exploratory | Results, Figures 2-3 |
| Harms | 19 | All important harms or unintended effects in each group (for specific guidance see CONSORT for harms) | Figure 2 |
| Discussion | | | |
| Limitations | 20 | Trial limitations, addressing sources of potential bias, imprecision, and, if relevant, multiplicity of analyses | Discussion, paragraphs 2, 3, 7, 8 |
| Generalisability | 21 | Generalisability (external validity, applicability) of the trial findings | Discussion, paragraphs 6, 9 |
| Interpretation | 22 | Interpretation consistent with results, balancing benefits and harms, and considering other relevant evidence | Discussion, paragraph 9 |
| Other information | | |  |
| Registration | 23 | Registration number and name of trial registry | Methods, section ‘Study area’ |
| Protocol | 24 | Where the full trial protocol can be accessed, if available | See below § |
| Funding | 25 | Sources of funding and other support (such as supply of drugs), role of funders | Financial disclosure section |

* We did not include sample size calculations because these are irrelevant when interpreting a completed study (Senn SJ. Power is indeed irrelevant in interpreting completed studies. BMJ 2002;325:1304; Cummings P, Rivara FP. Reporting statistical information in medical journal articles. Arch Pediatr Adolesc Med 2003;157:321-24; Verhoef H. Malnutrition, zinc deficiency and malaria in Africa. Lancet 2007;369:2156); all information about precision of our effect estimates is contained in the 95% CIs.

† Details are provided in a separate paper to which we referred in the text (reference 3).

‡ We do not report incidence differences, because do not know of valid methods to compute corresponding confidence intervals with multiple, correlated episodes within participants. However, we report incidence per group (Table 4), so that readers can compute point estimates for these differences.

§ Available upon request from corresponding author.
